# Supplementary material for: Pyrolysis study of solution-derived superconducting YBa2Cu3O7films: disentangling the physico-chemical transformations
Source: Royal Society of Chemistry journal article supplement (doi:10.1039/d0tc01846e), 2020-01-01
Supplement: d0tc01846e1.pdf [file d0tc01846e1.pdf]

## Supporting Information

# Pyrolysis study of solution-derived superconducting $\text{YBa}_2\text{Cu}_3\text{O}_7$ films: disentangling the physico-chemical transformations

Bohores Vallejo<sup>†</sup>, Cornelia Pop<sup>†</sup>, Sussagna Ricart<sup>†</sup>, Bernat Mundet<sup>†</sup>, Anna Palau<sup>†</sup>, Pere Roura-Grabulosa<sup>††</sup>, Jordi Farjas<sup>††</sup>, Teresa Puig<sup>†,\*</sup> and Xavier Obradors<sup>†,\*</sup>

<sup>†</sup> Institut de Ciència de Materials de Barcelona, CSIC, Campus de la UAB, 08193 Bellaterra, Catalonia, Spain

<sup>††</sup> University of Girona, Montilivi Campus, Edif. PII, E17071 Girona, Catalonia, Spain

\* Corresponding authors. E-mail: [obradors@icmab.es](mailto:obradors@icmab.es); ; [teresa.puig@icmab.es](mailto:teresa.puig@icmab.es)

## Videos

Video S1: Optical microscopy of a film prepared with solution 1 heated from room temperature to 320 °C at different heating rates within three temperature intervals.

Video S2: Optical microscopy of a film prepared with solution 1 heated from 200 °C to 240 °C at 2 °C/min showing reversible wrinkling formation.

Video S3: Optical microscopy of a film prepared with solution 1 heated from 150 °C to 240 °C at 15 °C/min showing irreversible wrinkling formation.

Video S4: Optical microscopy of a film prepared with solution 1+DEA heated from 150 °C to 270 °C at 5 °C/min showing reversible wrinkling formation.

Video S5: Optical microscopy of a film prepared with solution 2 heated from 150 °C to 270 °C at 10 °C/min showing reversible wrinkling formation.

## ADDITIONAL FIGURES

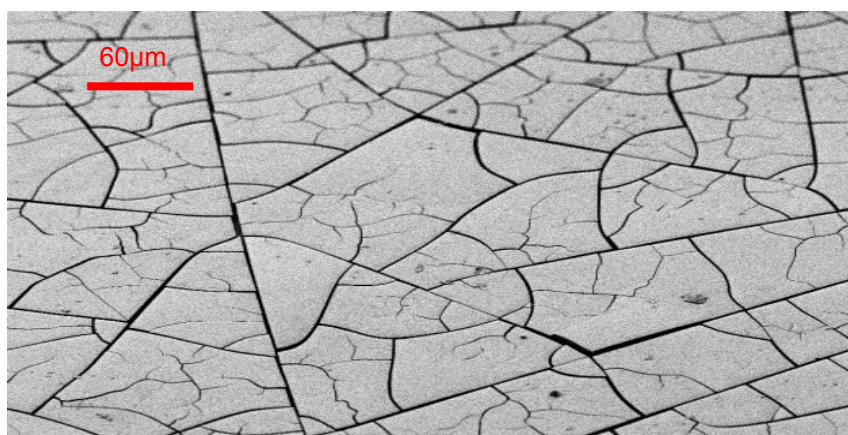

**Figure S1.** Typical crack network visualized by SEM in a YBCO film after growth. Typical pyrolysis conditions: 160°C-240°C at 10°C/min; 240-320°C at 5°C/min.

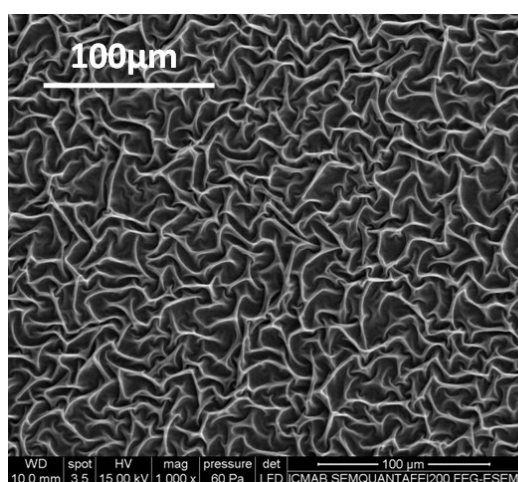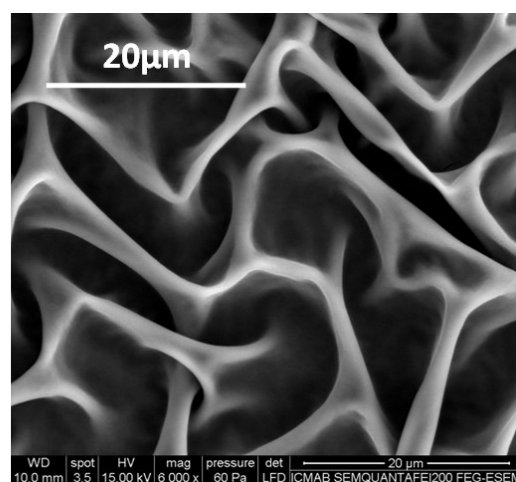

**Figure S2.** SEM images of a film surface buckled after pyrolysis magnified x1000 (left) and x 6000 (right). Films deposited using a solution 1 with a nominal thickness of 700 nm after growth.

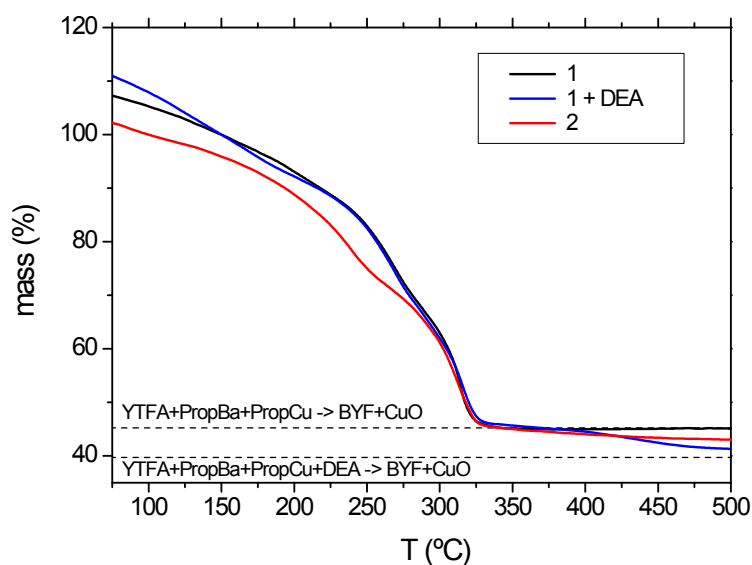

**Figure S3.** TGA analysis of YBCO films prepared from three different metalorganic solutions. The expected mass loss for the final pyrolyzed films is also indicated. Analysis performed in humid Oxygen atmosphere with a heating ramp of 20°C/min.

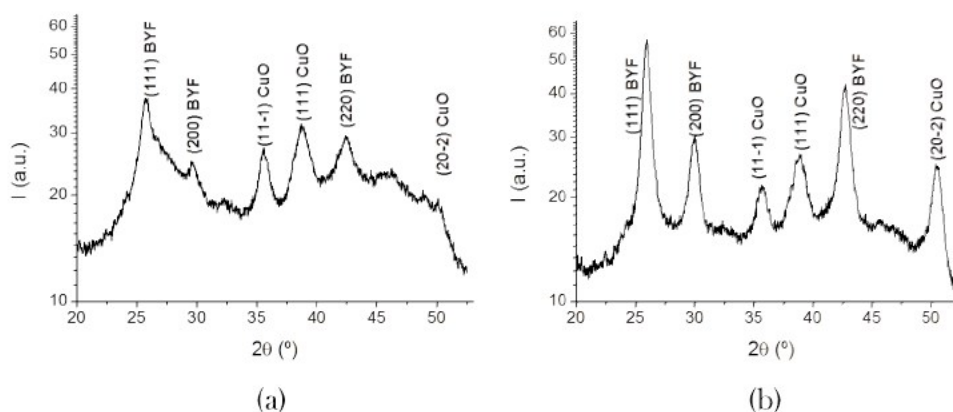

**Figure S4.** (2D) X-ray integrated diffraction pattern for a YBCO film pyrolyzed at (a) 320°C and (b) 500°C. The Bragg peaks corresponding to different phases (CuO, BYF) are identified.

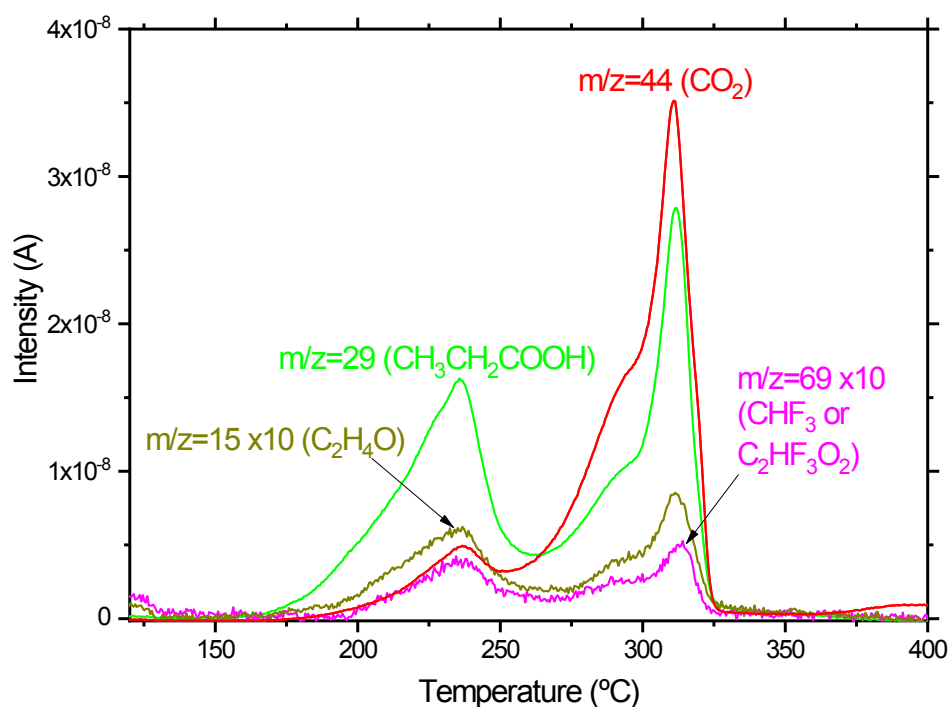

**Figure S5.** EGA-MS analysis of a solution 1 heated at 5°C/min in humid O<sub>2</sub> atmosphere (total pressure 10<sup>-5</sup> mbar). Evolution of the main fragments, the related volatile is indicated in parenthesis.

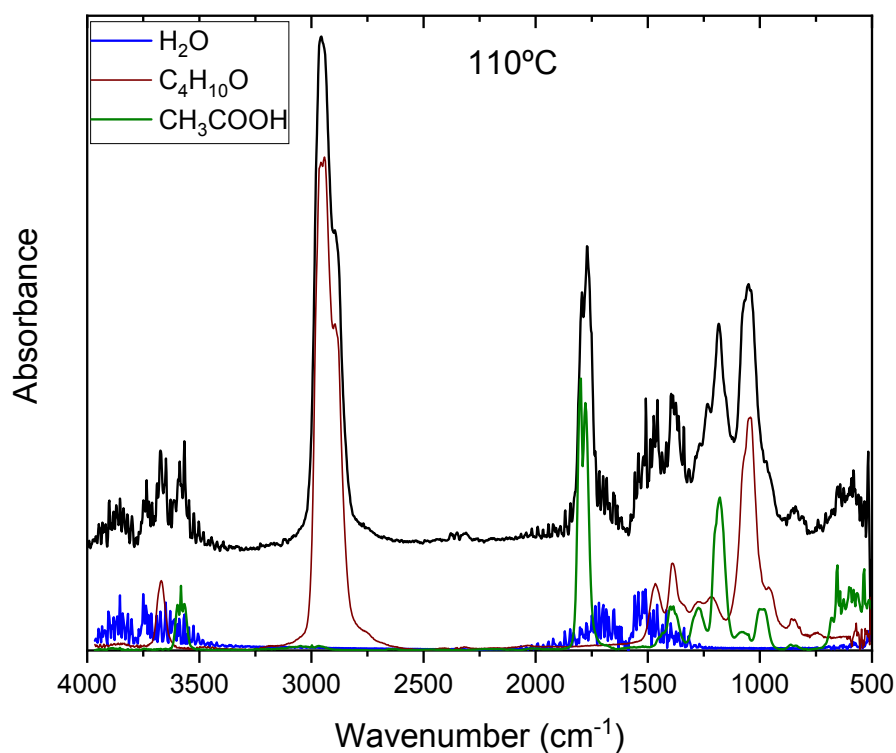

**Figure S6.** Top shifted curve (black line): FT-IR spectra of the volatiles evolved at 110°C for a solution 2. Bottom curves are all reference spectra obtained from the NIST library [1].

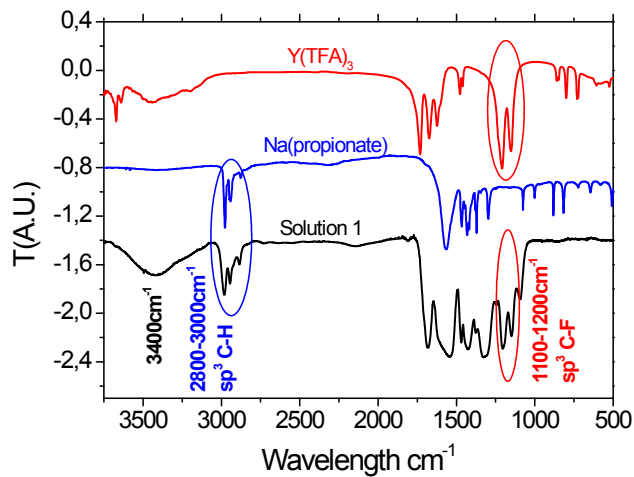

**Figure S7.** IR spectra for a sample after drying at 145°C for 45 minutes (black). In blue and red, the spectra of sodium propionate and yttrium trifluoroacetate respectively is shown. The absorbance band of the alkane group (C-H str.) used for the propionate determination is encircled in blue. Inside the red circle we find the bands corresponding to fluoromethyl (C-F str.) absorbance, assigned to trifluoroacetate molecule.

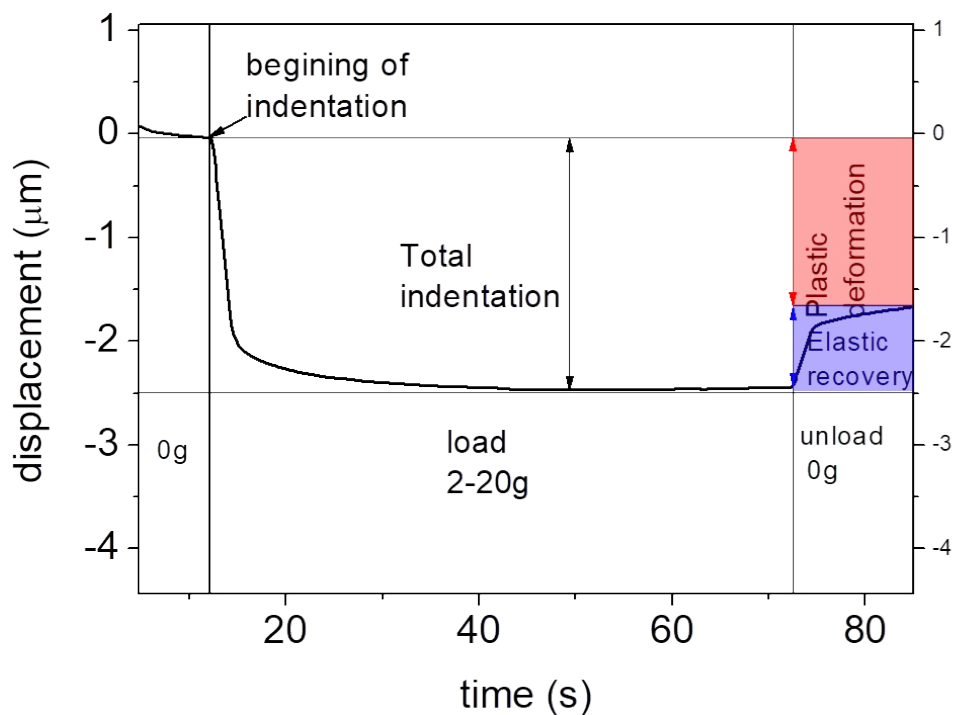

**Figure S8.** Typical example of a displacement curve obtained in a thermomechanical analysis (TMA) for a solid where elastic recovery is identified.

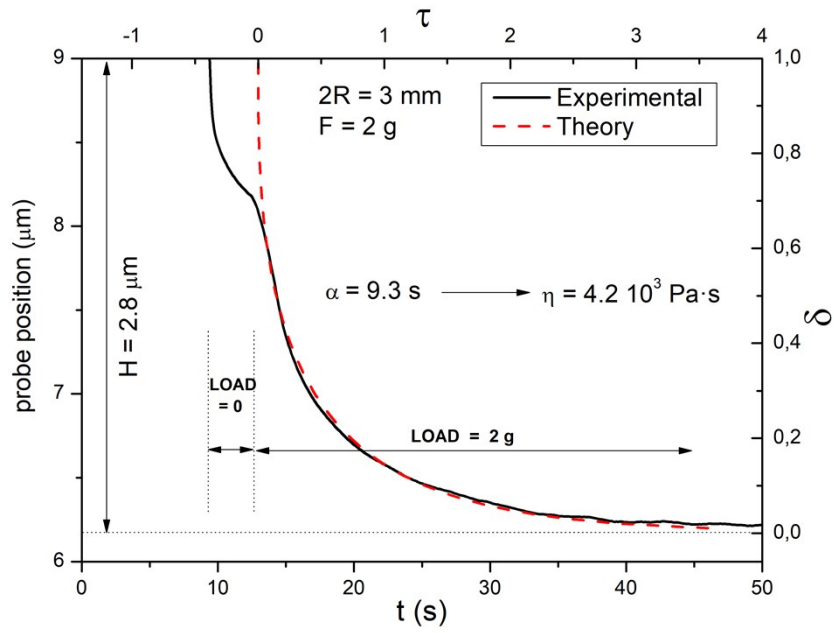

**Figure S9.** Typical fitting obtained from a TMA curve made according to eq. 3 of the main text. The experimental curve corresponds to a TMA performed at 260°C for a YBCO film made from 1+DEA solution.

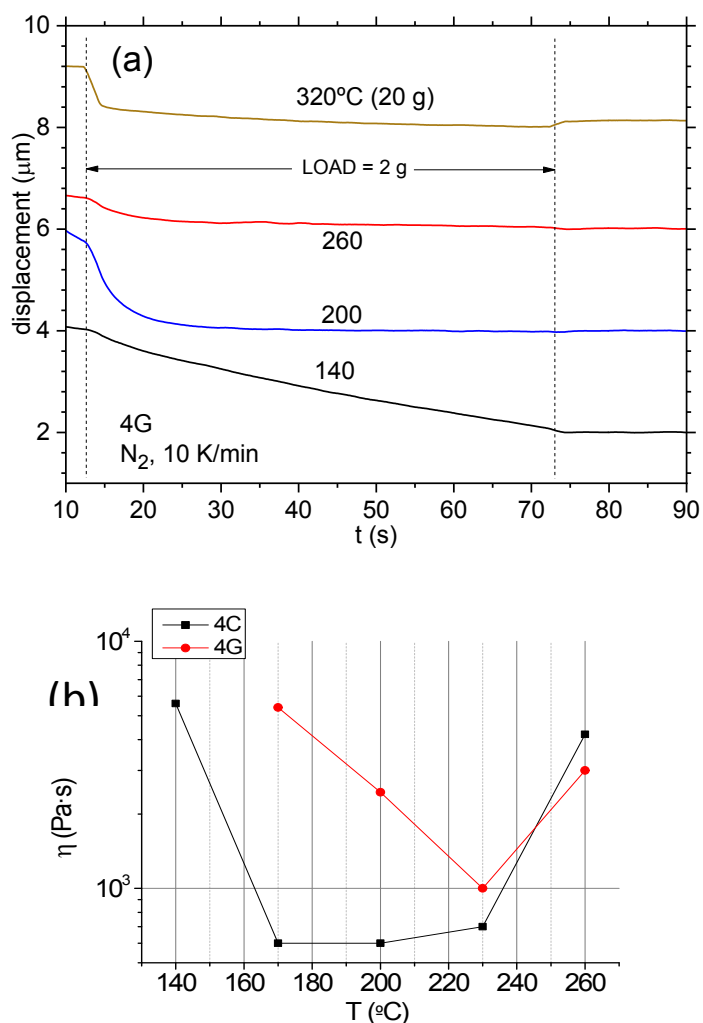

**Figure S10.** (a) Displacement curves over time obtained from the TMA of a solution 2 with 0.5M. The applied load was 2g except for the measure at 320°C; (b) Plot with the viscosity values obtained from the TMA measurements of solution 1 + DEA (black) and solution 2 with 0.5M (red).

## References

- [1] Wallace W. Infrared spectra. In: Linstrom PJ, Mallard WG, editors. NIST Chem WebBook, NIST Stand Ref Database. Gaithersburg MD: Institute of Standards and Technology; 2019. p. 20899
